# Supplementary material
Source: PubMed Central journal article supplement (PMC6512341)

## Supporting Information for

### **Brain Penetrable Histone Deacetylase 6 Inhibitor SW-100 Ameliorates Memory and Learning Impairments in a Mouse Model of Fragile X Syndrome**

Alan P. Kozikowski<sup>1,\*</sup>, Sida Shen<sup>2,‡</sup>, Marta Pardo<sup>3,‡</sup>, Maurício T. Tavares<sup>2</sup>, Dora Szarics<sup>4</sup>, Veronick Benoy<sup>5</sup>, Chad A. Zimprich<sup>6</sup>, Zsófia Kutil,<sup>7</sup> Guiping Zhang<sup>2</sup>, Cyril Bařinka,<sup>7</sup> Matthew B. Robers<sup>6</sup>, Ludo Van Den Bosch<sup>5</sup>, James H. Eubanks<sup>4</sup>, & Richard S. Jope<sup>3</sup>

<sup>1</sup> StarWise Therapeutics LLC, Madison, WI 53719, United States

<sup>2</sup> Department of Medicinal Chemistry and Pharmacognosy, College of Pharmacy, University of Illinois at Chicago, Chicago, IL 60612, United States

<sup>3</sup> Department of Psychiatry and Behavioral Sciences, Miller School of Medicine, University of Miami, Miami, FL 33136, United States

<sup>4</sup> Division of Genetics and Development, Krembil Research Institute, University Health Network, Toronto, Ontario M5G 2C4, Canada

<sup>5</sup> Laboratory of Neurobiology, Center for Brain & Disease (VIB) and Leuven Brain Institute (LBI), KU Leuven, B-3000 Leuven, Belgium

<sup>6</sup> Promega Corporation, Madison, WI 53711, United States

<sup>7</sup> Laboratory of Structural Biology, Institute of Biotechnology of the Czech Academy of Sciences, Prumyslova 595, 252 50 Vestec, Czech Republic

<sup>‡</sup>S.S and M.P. contributed equally to this paper.

\*Corresponding author: Alan P. Kozikowski, E-mail: [akozikowski@starwisetrx.com](mailto:akozikowski@starwisetrx.com)

## Supplementary tables and figures.

**Table S1.** Physicochemical properties of analogs **6-12**, SW-100, and TubA<sup>a</sup>

| Compound      | MW         | clogP        | clogD (7.4)  | pK <sub>a</sub> (basic) | tPSA      | HBD     | CNS MPO <sup>b</sup> |
|---------------|------------|--------------|--------------|-------------------------|-----------|---------|----------------------|
| <b>6</b>      | 217.23 (1) | 0.97 (1)     | 0.97 (1)     | 3.46 (1)                | 64.93 (1) | 2 (0.5) | 5.50                 |
| <b>7</b>      | 270.33 (1) | 3.02 (0.995) | 3.01 (0.495) | 5.12 (1)                | 52.57 (1) | 2 (0.5) | 4.99                 |
| <b>8</b>      | 299.31 (1) | 2.32 (1)     | 2.30 (0.85)  | 5.95 (1)                | 64.93 (1) | 2 (0.5) | 5.35                 |
| <b>9</b>      | 299.31 (1) | 2.32 (1)     | 2.30 (0.85)  | 5.86 (1)                | 64.93 (1) | 2 (0.5) | 5.35                 |
| <b>10</b>     | 302.76 (1) | 3.30 (0.85)  | 3.29 (0.355) | 0.99 (1)                | 52.57 (1) | 2 (0.5) | 4.71                 |
| <b>11</b>     | 286.31 (1) | 2.84 (1)     | 2.83 (0.585) | 0.84 (1)                | 52.57 (1) | 2 (0.5) | 5.09                 |
| <b>12</b>     | 296.33 (1) | 2.21 (1)     | 2.15 (0.925) | 6.55 (1)                | 76.96 (1) | 3 (0.1) | 4.19                 |
| <b>SW-100</b> | 316.78 (1) | 3.74 (0.63)  | 3.73 (0.135) | 2.91 (1)                | 52.57 (1) | 2 (0.5) | 4.27                 |
| <b>TubA</b>   | 335.41 (1) | 2.54 (1)     | 2.34 (0.83)  | 7.14 (1)                | 55.81 (1) | 2 (0.5) | 5.33                 |

<sup>a</sup>All the values were obtained by MarvinSketch version 18.5. <sup>b</sup>CNS MPO values were calculated according to the equation in the article by Wager, T. T. et al., *ACS Chem. Neurosci.* **2016**, 7, 767-775.

**Table S2.** Brain/plasma pilot PK studies of TubA.<sup>a</sup>

| route | dose<br>(mg/kg) | time<br>(h) | brain concentration<br>(ng/mL) | plasma concentration<br>(ng/mL) | brain/plasma<br>ratio |
|-------|-----------------|-------------|--------------------------------|---------------------------------|-----------------------|
| IV    | 3               | 0.133       | 40.5 ± 3.4                     | 273.5 ± 30.4                    | 0.15                  |
| IV    | 3               | 1           | 17.5 ± 2.6                     | 20.3 ± 0.64                     | 0.86                  |

<sup>a</sup>TubA was administered to C57BL/6 male mice by IV administration at the dose of 3 mg/kg. Blood and brain samples were collected at 8 min and 60 min time-points. Brain tissues were homogenized at a 1:4 ratio of tissue weight (g) to volume of PBS (mL). The data found (ng/mL) was multiplied by 5 to obtain the concentration (ng/mL) in brain tissues. PK studies were performed by Pharmaron, Inc. (Irvine, CA).

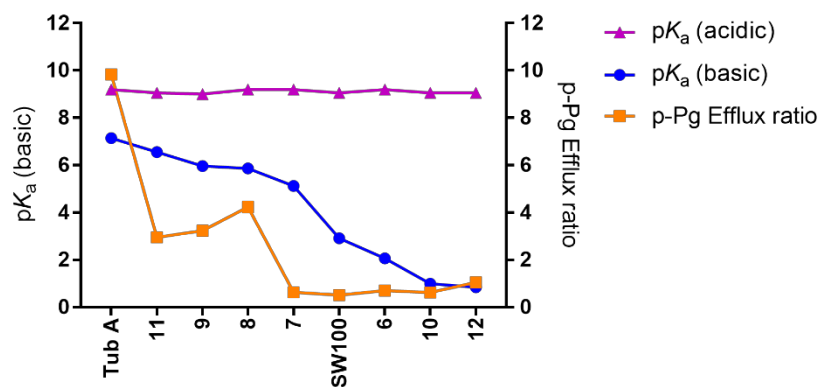

**Figure S1.** The comparison of  $pK_a$  values (basic and acidic) and P-gp efflux ratios.

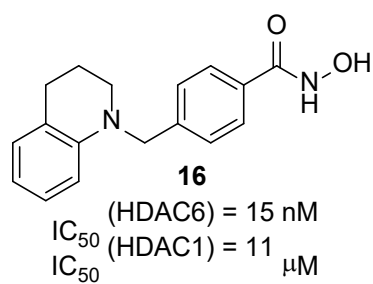

**Figure S2.** The structure of compound **16**.

# <sup>1</sup>H NMR spectra and LC-MS purity reports for compounds 6-12, SW-100, TubA, and NexA

## Compound 6

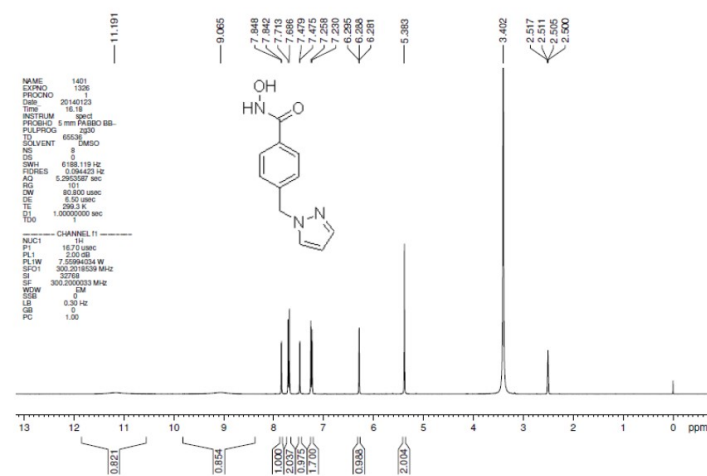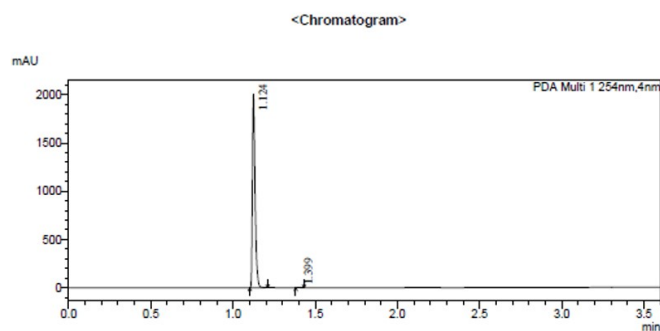

| Peak# | Ret. Time | Height  | Height% | Area    | Area%   |
|-------|-----------|---------|---------|---------|---------|
| 1     | 1.124     | 2011322 | 99.851  | 2243192 | 99.856  |
| 2     | 1.399     | 3003    | 0.148   | 3247    | 0.145   |
| Total |           | 2014325 | 100.000 | 2246439 | 100.000 |

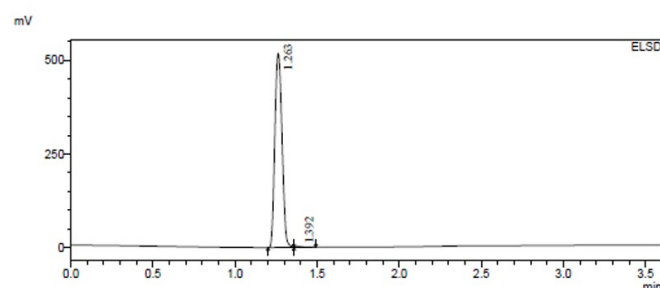

| Peak# | Ret. Time | Height | Height% | Area    | Area%   |
|-------|-----------|--------|---------|---------|---------|
| 1     | 1.263     | 514409 | 99.536  | 1567146 | 99.448  |
| 2     | 1.392     | 2397   | 0.464   | 3897    | 0.552   |
| Total |           | 516805 | 100.000 | 1570943 | 100.000 |

## Compound 7

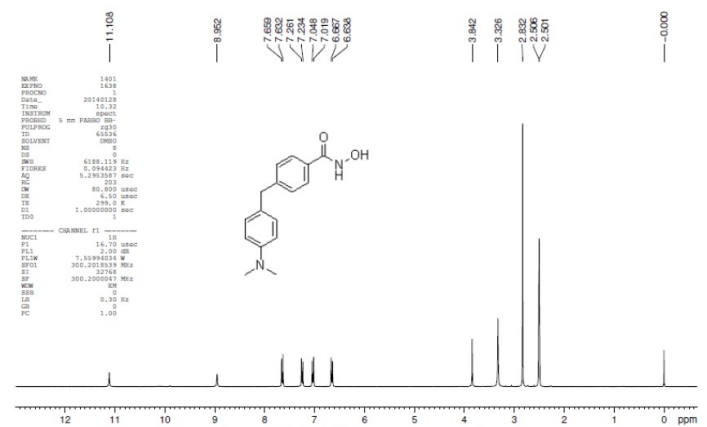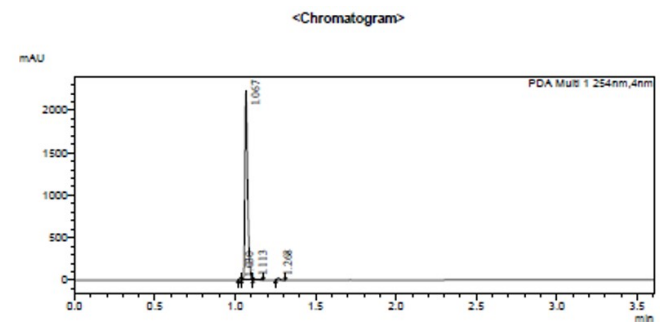

| Peak# | Ret. Time | Height  | Height% | Area    | Area%   |
|-------|-----------|---------|---------|---------|---------|
| 1     | 1.030     | 802     | 0.035   | 576     | 0.022   |
| 2     | 1.067     | 2236401 | 98.554  | 2544164 | 98.560  |
| 3     | 1.113     | 6772    | 0.298   | 8087    | 0.314   |
| 4     | 1.268     | 25017   | 1.103   | 25896   | 1.004   |
| Total |           | 2268992 | 100.000 | 2578722 | 100.000 |

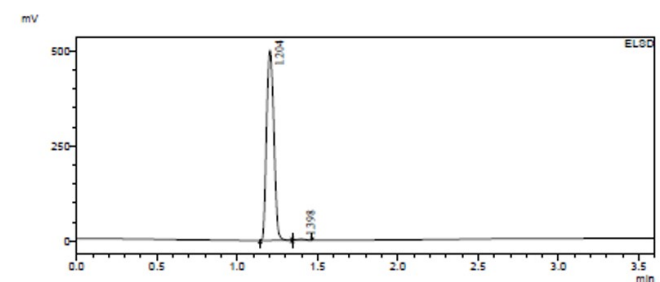

| Peak# | Ret. Time | Height | Height% | Area    | Area%   |
|-------|-----------|--------|---------|---------|---------|
| 1     | 1.204     | 495172 | 99.430  | 1578638 | 99.349  |
| 2     | 1.398     | 2845   | 0.570   | 10338   | 0.651   |
| Total |           | 498017 | 100.000 | 1588977 | 100.000 |

## Compound 8

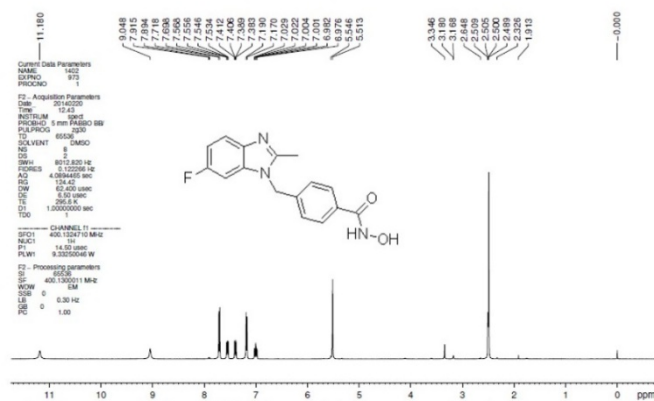

MS Spectrum Graph

#1 Ret Time: Single 1.050 (Scan#91)

BG Mode: PkStart 0.910 (79)

Mass Peaks: 459 Base Peak: 299.95 (850785) Polarity: Pos Segment: 1 - Event: 1

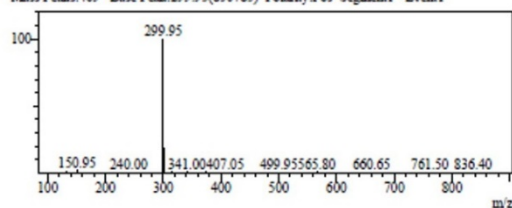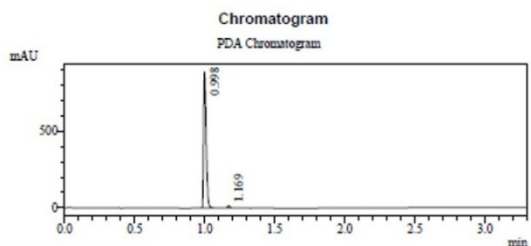

PeakTable

| Peak# | Ret. Time | Height | Height % | Area    | Area %  |
|-------|-----------|--------|----------|---------|---------|
| 1     | 0.998     | 883498 | 98.320   | 1102143 | 98.492  |
| 2     | 1.169     | 15100  | 1.671    | 18879   | 1.508   |
| Total |           | 903598 | 100.000  | 1119021 | 100.000 |

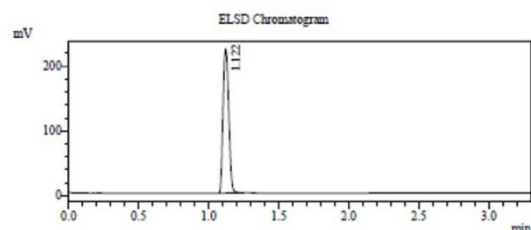

PeakTable

| Peak# | Ret. Time | Height | Height % | Area   | Area %  |
|-------|-----------|--------|----------|--------|---------|
| 1     | 1.122     | 222428 | 100.000  | 631034 | 100.000 |
| Total |           | 222428 | 100.000  | 631034 | 100.000 |

## Compound 9

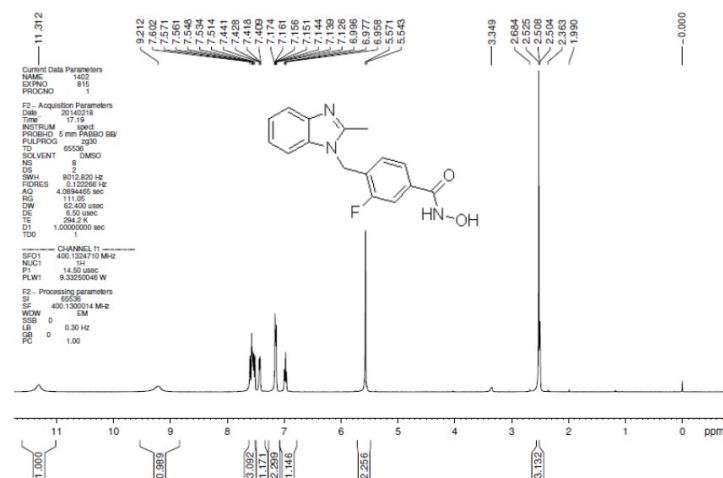

MS Spectrum Graph

#1 Ret Time: Single 1.050 (Scan#91)

BG Mode: PkStart 0.898 (78)

Mass Peaks: 320 Base Peak: 299.95 (1969931) Polarity: Pos Segment: 1 - Event: 1

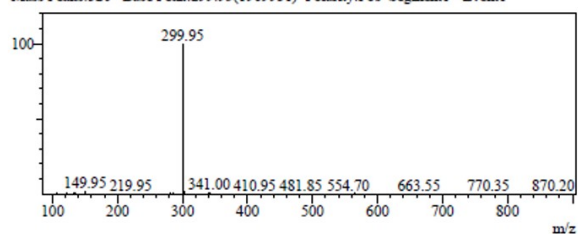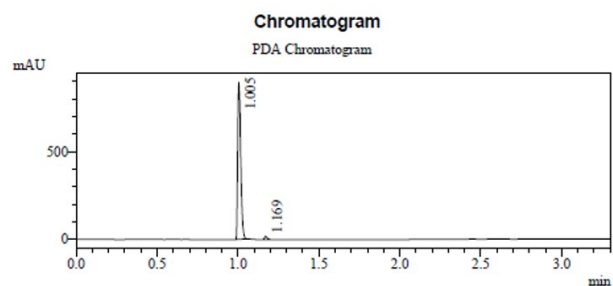

PeakTable

| Peak# | Ret. Time | Height | Height % | Area    | Area %  |
|-------|-----------|--------|----------|---------|---------|
| 1     | 1.005     | 895953 | 97.979   | 1153107 | 98.165  |
| 2     | 1.169     | 18481  | 2.021    | 21549   | 1.835   |
| Total |           | 914434 | 100.000  | 1174656 | 100.000 |

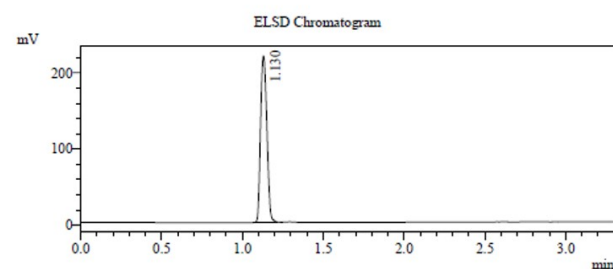

PeakTable

| Peak# | Ret. Time | Height | Height % | Area   | Area %  |
|-------|-----------|--------|----------|--------|---------|
| 1     | 1.130     | 216331 | 100.000  | 592521 | 100.000 |
| Total |           | 216331 | 100.000  | 592521 | 100.000 |

## Compound 10

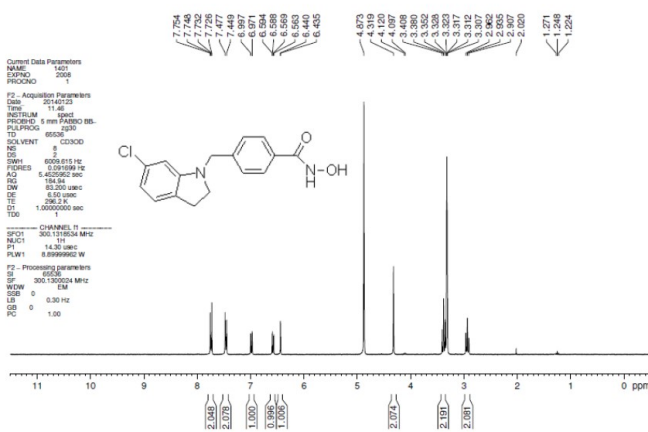

MS Spectrum Graph

#1 Ret Time: Single 2.800 (Scan# 241)  
BG Mode: PkStart 2.765 (238)  
Mass Peaks: 557 Base Peak: 302.90 (83826) Polarity: Pos Segment 1 - Event 1

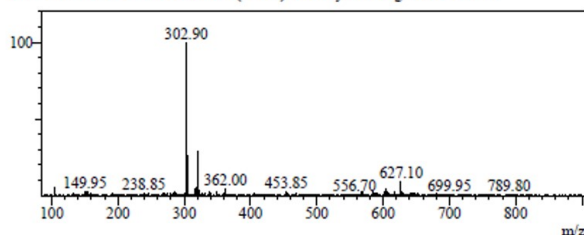

Chromatogram  
PDA Chromatogram

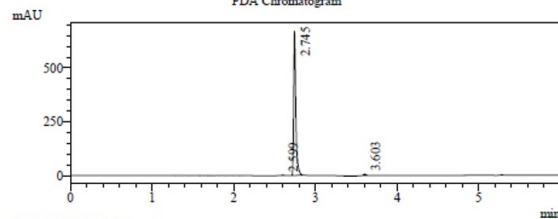

1 PDA Multi 1 / 254nm 4nm

PeakTable

| Peak# | Ret. Time | Height | Height % | Area    | Area %  |
|-------|-----------|--------|----------|---------|---------|
| 1     | 2.599     | 2748   | 0.404    | 4849    | 0.399   |
| 2     | 2.745     | 670731 | 98.562   | 1197410 | 98.495  |
| 3     | 3.603     | 7038   | 1.034    | 13443   | 1.106   |
| Total |           | 680517 | 100.000  | 1215702 | 100.000 |

ELSD Chromatogram

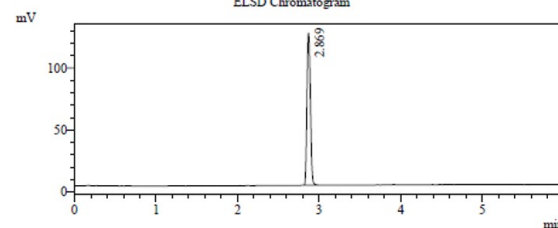

AD2 Ch1

PeakTable

| AD2 Ch1 |           |        |          |        |         |
|---------|-----------|--------|----------|--------|---------|
| Peak#   | Ret. Time | Height | Height % | Area   | Area %  |
| 1       | 2.869     | 122053 | 100.000  | 358435 | 100.000 |
| Total   |           | 122053 | 100.000  | 358435 | 100.000 |

## Compound 12

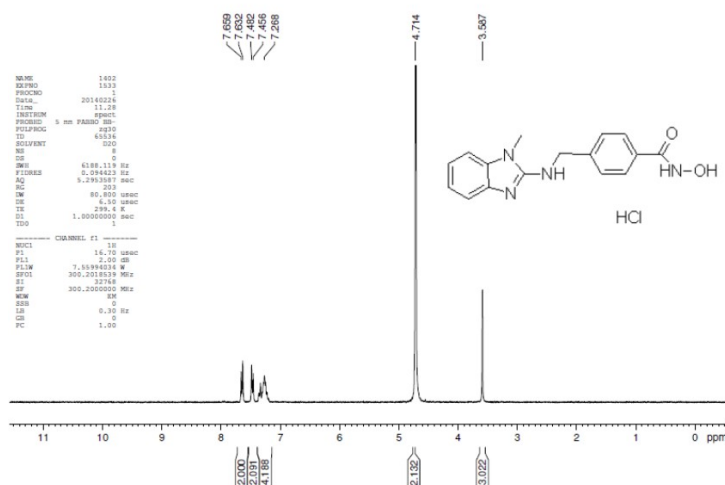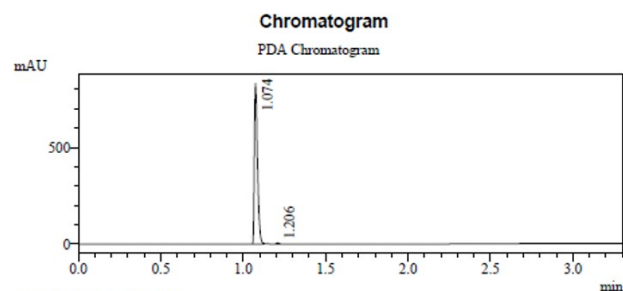

1 PDA Multi 1 / 254nm 4nm

PeakTable

| Peak# | Ret. Time | Height | Height % | Area    | Area %  |
|-------|-----------|--------|----------|---------|---------|
| 1     | 1.074     | 831308 | 99.211   | 1087782 | 99.303  |
| 2     | 1.206     | 6607   | 0.789    | 7637    | 0.697   |
| Total |           | 837915 | 100.000  | 1095420 | 100.000 |

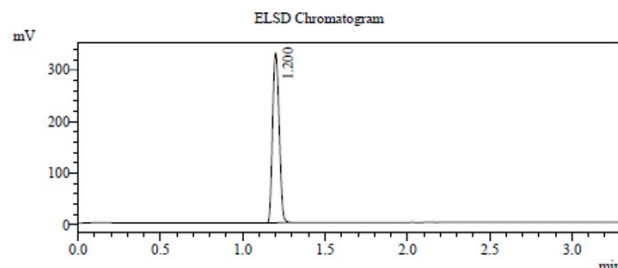

PeakTable

| Peak# | Ret. Time | Height | Height % | Area   | Area %  |
|-------|-----------|--------|----------|--------|---------|
| 1     | 1.200     | 326692 | 100.000  | 918862 | 100.000 |
| Total |           | 326692 | 100.000  | 918862 | 100.000 |

#1 Ret.Time:Single 1.120(Scan#:97)  
BG Mode:PkStart 0.922(80)  
Mass Peaks:349 Base Peak:296.95(1910364) Polarity:Pos Segment1 - Event1

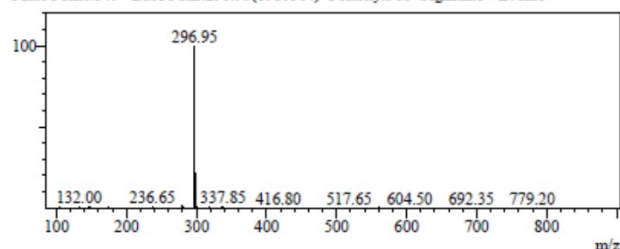

## Tubastatin A

<Chromatogram>

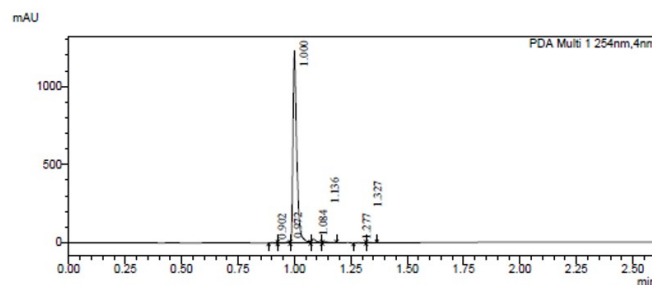

Peak Table

| Peak# | Ret. Time | Height  | Height% | Area    | Area%   |
|-------|-----------|---------|---------|---------|---------|
| 1     | 0.902     | 3203    | 0.250   | 3489    | 0.234   |
| 2     | 0.972     | 7831    | 0.811   | 9300    | 0.628   |
| 3     | 1.000     | 1233450 | 98.282  | 1417452 | 95.488  |
| 4     | 1.084     | 235698  | 1.842   | 33350   | 2.247   |
| 5     | 1.136     | 6401    | 0.500   | 10365   | 0.698   |
| 6     | 1.277     | 2734    | 0.213   | 5892    | 0.391   |
| 7     | 1.327     | 3881    | 0.301   | 4595    | 0.310   |
| Total |           | 1281077 | 100.000 | 1484423 | 100.000 |

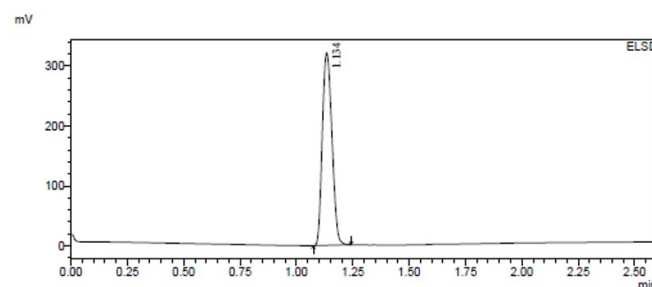

Peak Table

| Peak# | Ret. Time | Height | Height% | Area   | Area%   |
|-------|-----------|--------|---------|--------|---------|
| 1     | 1.134     | 313863 | 100.000 | 954808 | 100.000 |
| Total |           | 313863 | 100.000 | 954808 | 100.000 |

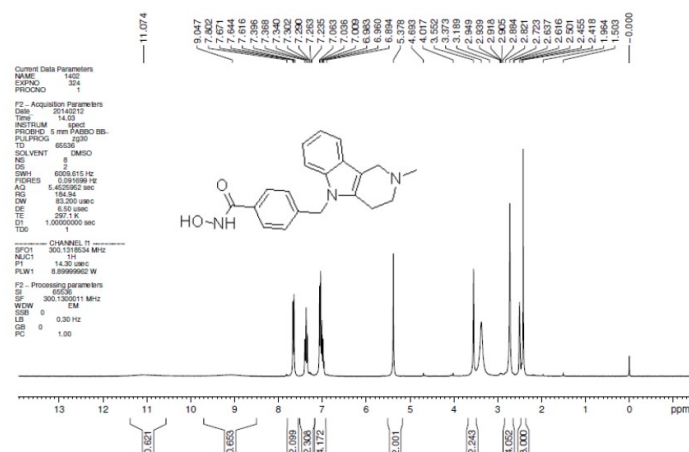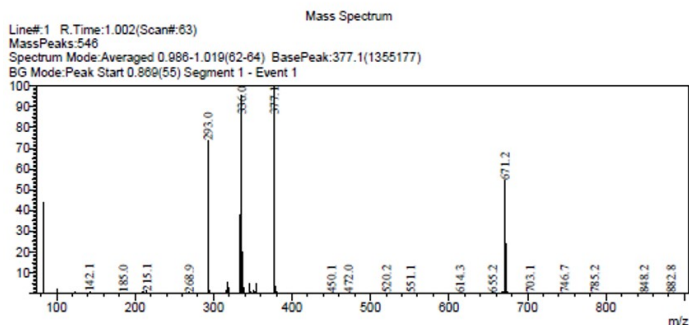

Line#1 R.Time:1.002(Scan#:63)  
MassPeaks:548  
Spectrum Mode:Averaged 0.988-1.019(62-64) BasePeak:377.1(1355177)  
BG Mode:Peak Start 0.869(55) Segment 1 - Event 1

## Nexturastat A

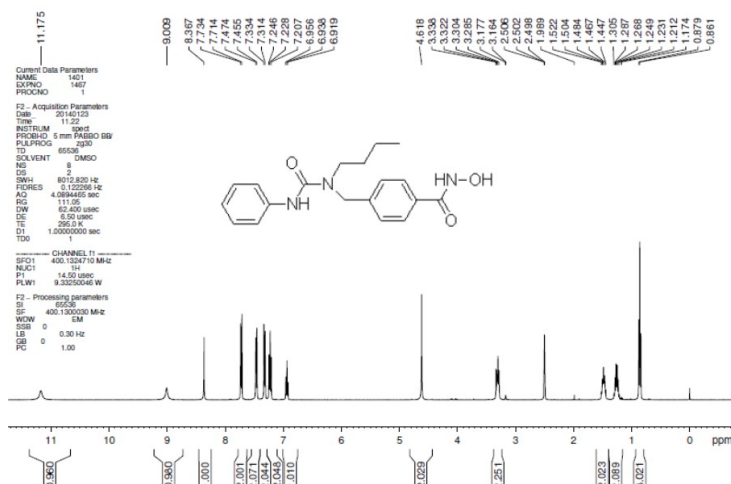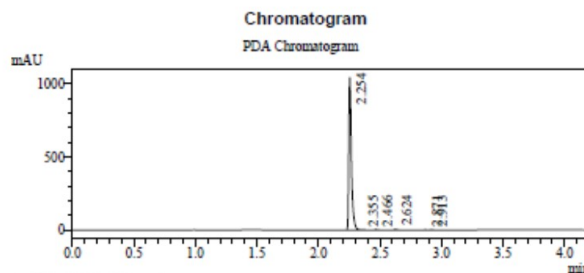

PeakTable

| Peak# | Ret. Time | Height  | Height % | Area    | Area %  |
|-------|-----------|---------|----------|---------|---------|
| 1     | 2.254     | 1041918 | 98.803   | 1549967 | 98.630  |
| 2     | 2.355     | 1311    | 0.124    | 2250    | 0.143   |
| 3     | 2.466     | 3767    | 0.356    | 5128    | 0.326   |
| 4     | 2.624     | 5766    | 0.548    | 7498    | 0.477   |
| 5     | 2.871     | 1006    | 0.095    | 2469    | 0.157   |
| 6     | 2.913     | 2913    | 0.278    | 4180    | 0.266   |
| Total |           | 1056688 | 100.000  | 1571492 | 100.000 |

MS Spectrum Graph  
#1 Ret.Time:Single 2.298(Scan#:198)  
BG Mode:None  
Mass Peaks:478 Base Peak:342.00(964326) Polarity:Pos Segment1 - Event1

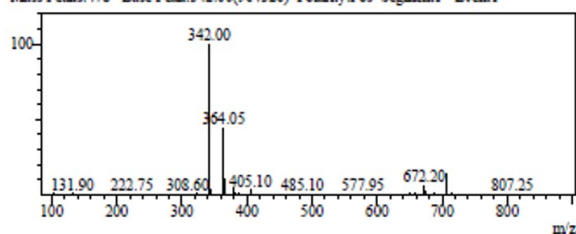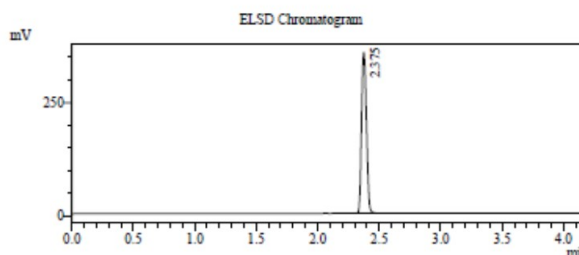

PeakTable

| Peak# | Ret. Time | Height | Height % | Area   | Area %  |
|-------|-----------|--------|----------|--------|---------|
| 1     | 2.375     | 351533 | 100.000  | 985545 | 100.000 |
| Total |           | 351533 | 100.000  | 985545 | 100.000 |

## SW-100

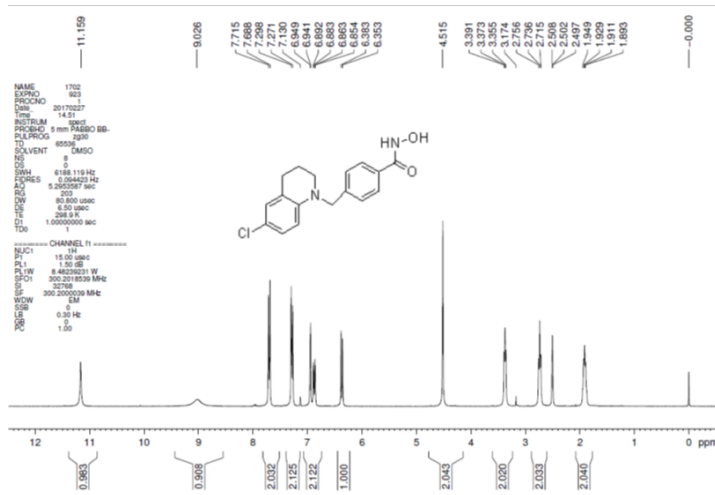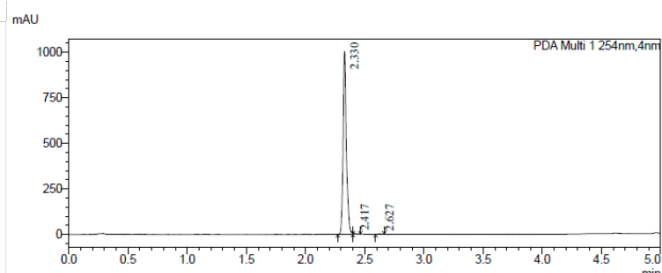

PeakTable

| Peak# | Ret. Time | Height | Height % | Area    | Area %  |
|-------|-----------|--------|----------|---------|---------|
| 1     | 2.330     | 952790 | 99.336   | 1959913 | 99.386  |
| 2     | 2.417     | 3678   | 0.382    | 7328    | 0.372   |
| 3     | 2.627     | 2710   | 0.282    | 4772    | 0.242   |
| Total |           | 962178 | 100.000  | 1972013 | 100.000 |

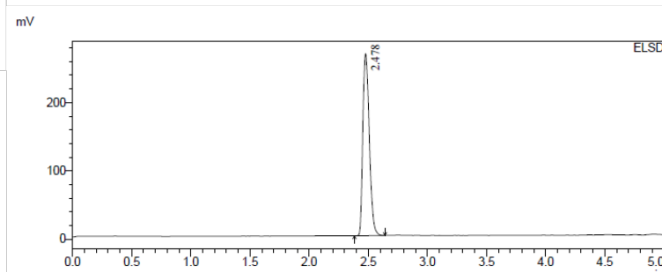

PeakTable

| Peak# | Ret. Time | Height | Height % | Area    | Area %  |
|-------|-----------|--------|----------|---------|---------|
| 1     | 2.478     | 264302 | 100.000  | 1014729 | 100.000 |
| Total |           | 264302 | 100.000  | 1014729 | 100.000 |

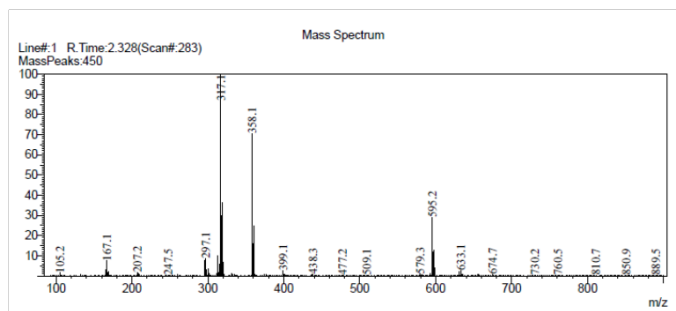

Supplement: NIHMS1026589-supplement-Supporting_information.pdf [file NIHMS1026589-supplement-Supporting_information.pdf]
